# Supplementary material for: Uterine Rbpj is required for embryonic-uterine orientation and decidual remodeling via Notch pathway-independent and -dependent mechanisms
Source: PubMed Central journal article supplement — Cell Res. 2014 Jun 27;24(8):925–42. doi: 10.1038/cr.2014.82 (PMC4123295; doi:10.1038/cr.2014.82), 2014-06-27
Supplement: cr201482x3.pdf [file cr201482x3.pdf]

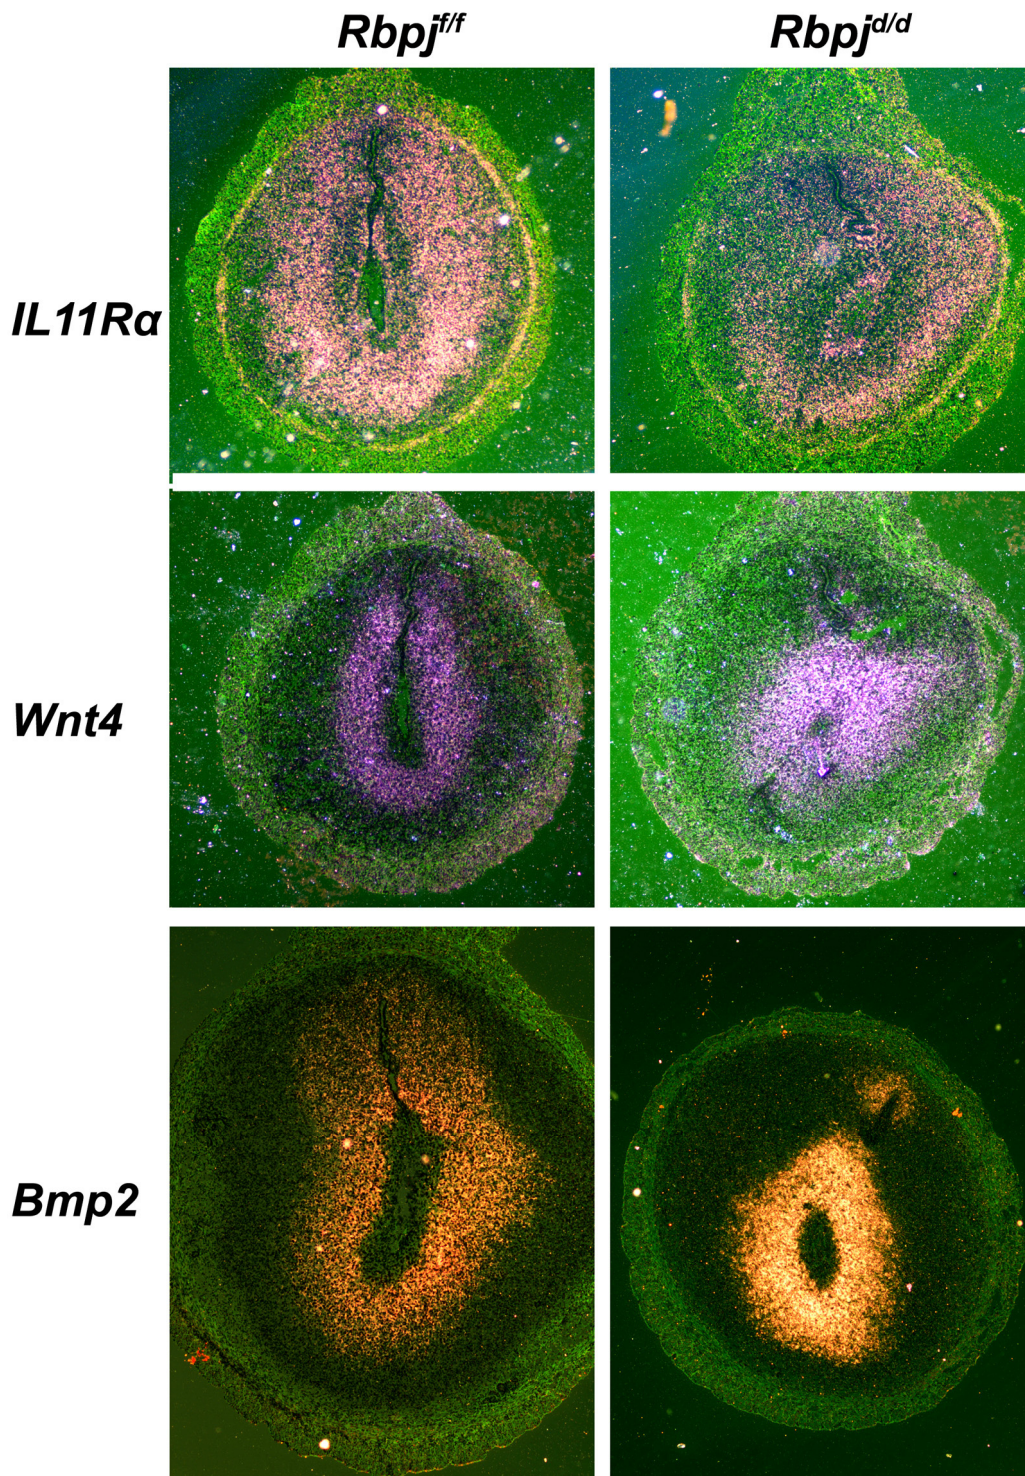

**Supplementary information, Figure S3.** *In situ* hybridization of decidua-related genes *IL11R $\alpha$* , *Wnt4* and *Bmp2* at day 6 of pregnancy in *Rbpj<sup>f/f</sup>* and *Rbpj<sup>d/d</sup>* mice.
