# Supplementary material for: Uterine Rbpj is required for embryonic-uterine orientation and decidual remodeling via Notch pathway-independent and -dependent mechanisms
Source: PubMed Central journal article supplement — Cell Res. 2014 Jun 27;24(8):925–42. doi: 10.1038/cr.2014.82 (PMC4123295; doi:10.1038/cr.2014.82), 2014-06-27
Supplement: cr201482x6.pdf [file cr201482x6.pdf]

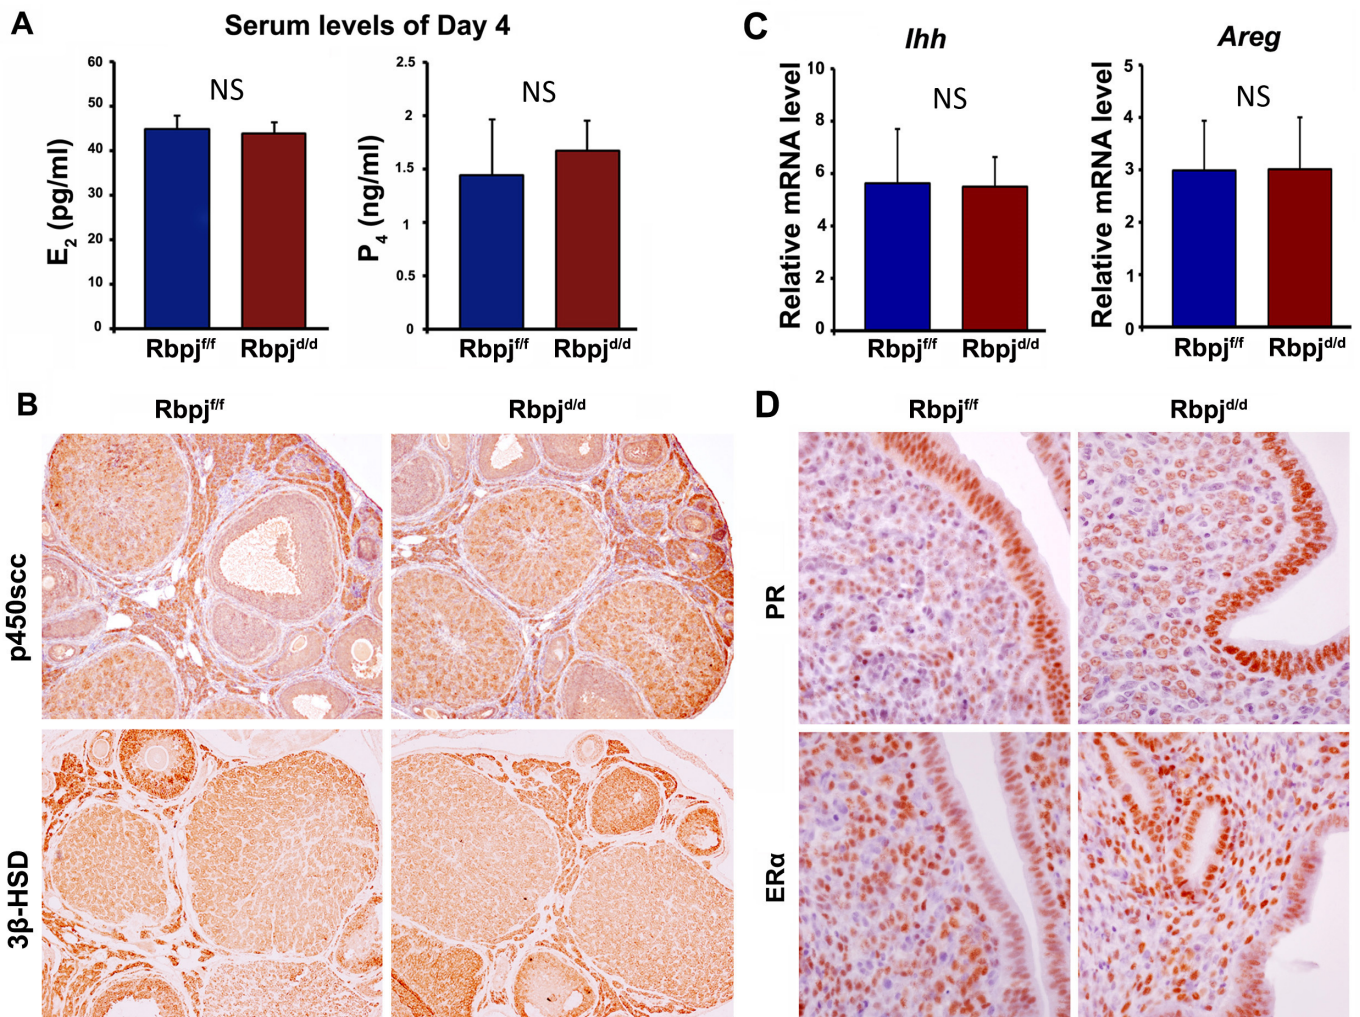

**Supplementary information, Figure S6.** *Rbpj<sup>ff</sup>* and *Rbpj<sup>d/d</sup>* mice have comparable levels of ovarian steroid hormones as well as uterine expression of their receptors. (A) Serum level of E<sub>2</sub> and P<sub>4</sub> at day 4 of pregnancy. (B) Immunohistochemistry of 3β-HSD and P450scc on day 4 ovaries. (C) The expression levels of P<sub>4</sub> regulated genes *Ihh*, *Areg* in *Rbpj<sup>ff</sup>* and *Rbpj<sup>d/d</sup>* uteri at day 4 of pregnancy. Values are normalized by GAPDH expression level and indicated as mean±SEM. *N* =3. (D) Immunohistochemistry of ERα and PR on day 4 uteri of *Rbpj<sup>ff</sup>* and *Rbpj<sup>d/d</sup>* mice. Note the structural changes in uterine lumen in *Rbpj<sup>d/d</sup>* mice.
