# Supplementary material for: Uterine Rbpj is required for embryonic-uterine orientation and decidual remodeling via Notch pathway-independent and -dependent mechanisms
Source: PubMed Central journal article supplement — Cell Res. 2014 Jun 27;24(8):925–42. doi: 10.1038/cr.2014.82 (PMC4123295; doi:10.1038/cr.2014.82), 2014-06-27
Supplement: cr201482x9.pdf [file cr201482x9.pdf]

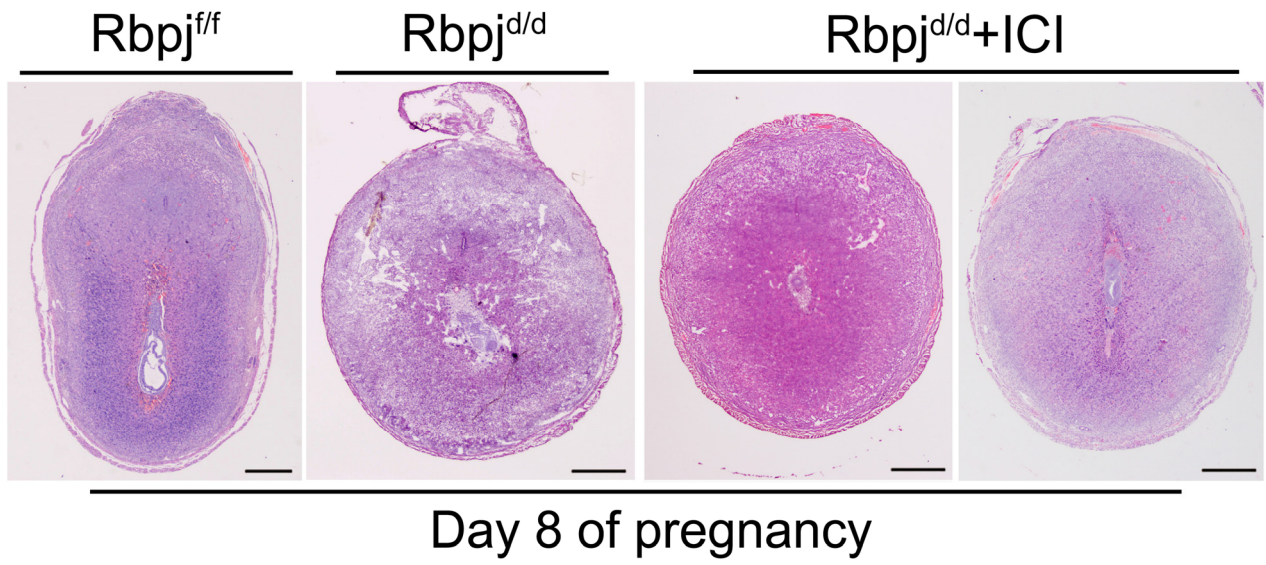

**Supplementary information, Figure S9** Representative cross-sections of *Rbpj<sup>f/f</sup>*, *Rbpj<sup>d/d</sup>* and ICI treated *Rbpj<sup>d/d</sup>* implantation sites on Day 8 of pregnancy.
